# Supplementary material for: Oral exposure to ovalbumin alters glucose metabolism in sensitized mice: upregulation of HIF-1α-mediated glycolysis
Source: Royal Society of Chemistry journal article supplement (doi:10.1039/d4fo04019h), 2024-12-17
Supplement: d4fo04019h2.pdf [file d4fo04019h2.pdf]

## Supplementary material

### **Oral exposure to ovalbumin alters glucose metabolism in sensitized mice: upregulation of HIF-1 $\alpha$ -mediated glycolysis**

FangFang Min<sup>1,2</sup>, Zhongliang Wang<sup>1,2</sup>, Huming Shao<sup>1,2</sup>, Shuangyan Zheng<sup>1,3,4</sup>, Youdou Cheng<sup>1,2</sup>, Wenfeng Liu<sup>1,2</sup>, Jian Wang<sup>1,2</sup>, Meini Wang<sup>3</sup>, Yong Wu<sup>1,3,4\*</sup>, Hongbing Chen<sup>1,3,4\*</sup>

<sup>1</sup> *State Key Laboratory of Food Science and Resources, Nanchang University, Nanchang 330047, Jiangxi, PR China;*

<sup>2</sup> *School of Food Science and Technology, Nanchang University, Nanchang 330031, Jiangxi, PR China;*

<sup>3</sup> *Sino-German Joint Research Institute, Nanchang University, Nanchang 330047, Jiangxi, PR China;*

<sup>4</sup> *Jiangxi Province Key Laboratory of Food Allergy, Nanchang University, Nanchang, 330047, Jiangxi, PR China.*

-----  
\* Corresponding author. State Key Laboratory of Food Science and Resources, Nanchang University, Nanchang, Jiangxi, China; Sino-German Joint Research Institute, Nanchang University, Nanchang, Jiangxi, China; Jiangxi Province Key Laboratory of Food Allergy, Nanchang University, Nanchang, Jiangxi, China.

E-mail address: [ericyo918@hotmail.com](mailto:ericyo918@hotmail.com) (Y. W), [chenhongbing@ncu.edu.cn](mailto:chenhongbing@ncu.edu.cn) (H. C).

**Table S1.** The primer sequences used for quantitative real-time PCR analysis.

| <b>Gene name</b>                | <b>Primer</b> | <b>Sequence (5'-3')</b> |
|---------------------------------|---------------|-------------------------|
| <i>Ldha</i>                     | Forward       | TGTCTCCAGCAAAGACTACTGT  |
|                                 | Reverse       | GACTGTACTTGACAATGTTGGGA |
| <i>Pfkl</i>                     | Forward       | GAACTACGCACACTTGACCAT   |
|                                 | Reverse       | CTCCAAAACAAAGGTCCTCTGG  |
| <i>Pgam1</i>                    | Forward       | AGCGACACTATGGCGGTCT     |
|                                 | Reverse       | TGGGACATCATAAGATCGTCTCC |
| <i>Pfkp</i>                     | Forward       | GAAACATGAGGCGTTCTGTGT   |
|                                 | Reverse       | CCCGGCACATTGTTGGAGA     |
| <i>Hkdc1</i>                    | Forward       | GGAATGGCACGGAGCTTTTTG   |
|                                 | Reverse       | ACCCTCCTCCA ACTTATTCTGT |
| <i>Hif1a</i>                    | Forward       | ACCTTCATCGGAAACTCCAAAG  |
|                                 | Reverse       | ACTGTTAGGCTCAGGTGAACT   |
| <i>GATA3</i>                    | Forward       | TTATCAAGCCCAAGCGAAG     |
|                                 | Reverse       | CCATTAGCGTTCCTCCTCCA    |
| <i>T-bet</i>                    | Forward       | CTGCCTACCAGAACGCAGA     |
|                                 | Reverse       | AAACGGCTGGGAACAGGA      |
| <i><math>\beta</math>-actin</i> | Forward       | GTGACGTTGACATCCGTAAAGA  |
|                                 | Reverse       | GCCGGACTCATCGTACTCC     |

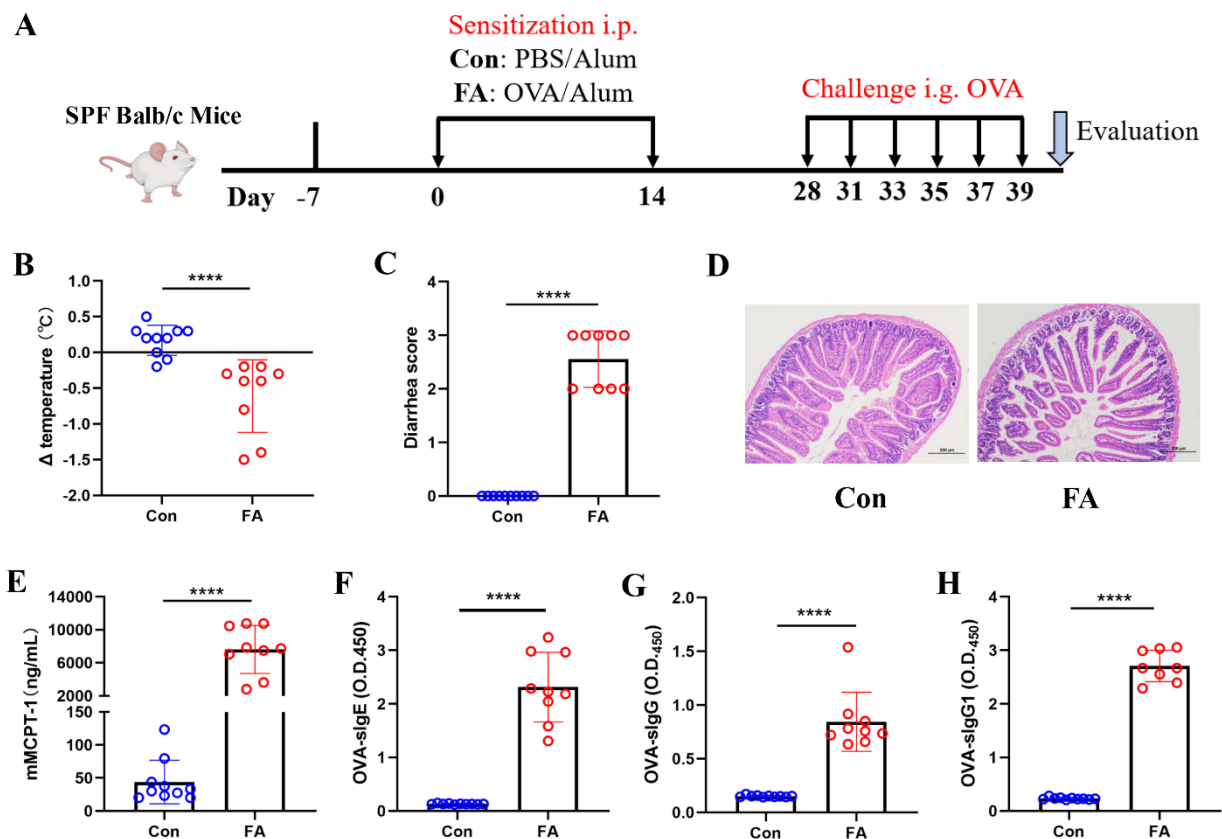

**Figure S1. Oral OVA challenges induced allergic reactions in sensitized mice.** (A) Experimental protocol of sensitization and challenge. i.g., intragastric gavage. i.p., intraperitoneal injection. (B) The body temperature change after the sixth oral challenge with OVA. (C) Diarrhea score of mice after the sixth challenge. (D) H&E staining of the jejunum sections. (E) The levels of mMCPT-1 in serum. (F-H) The levels of OVA-specific IgE, IgG and IgG1 in serum. Data are represented as means  $\pm$  SD. \*\*\*\* $p < 0.0001$  using Mann-Whitney  $U$  test or Student's  $t$  test.

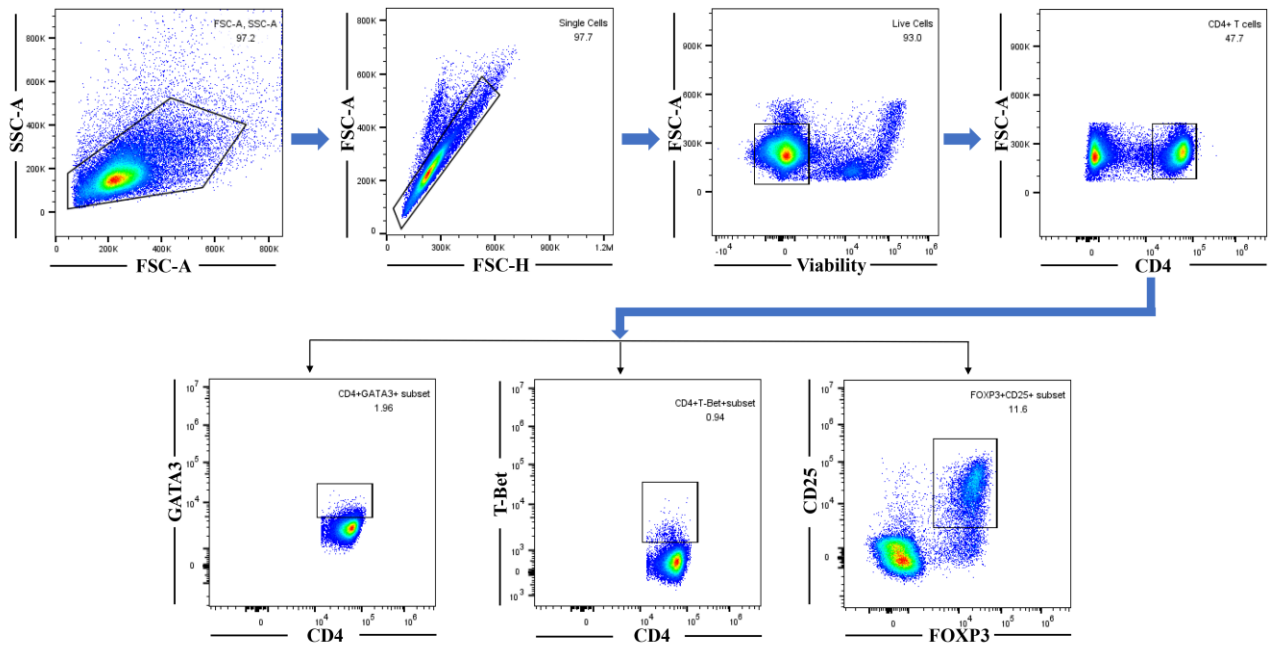

**Figure S2.** The gating strategy of T cell subsets in mesenteric lymph node.

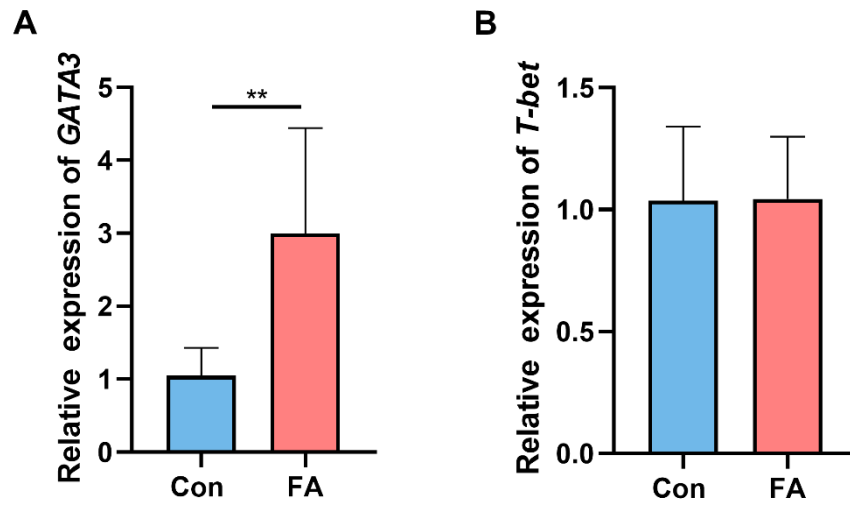

**Figure S3.** The gene expression of GATA3 and T-bet in the jejunum measured by RT-qPCR. Data are represented as means  $\pm$  SD. \*\* $p < 0.01$  using Student's  $t$  test.

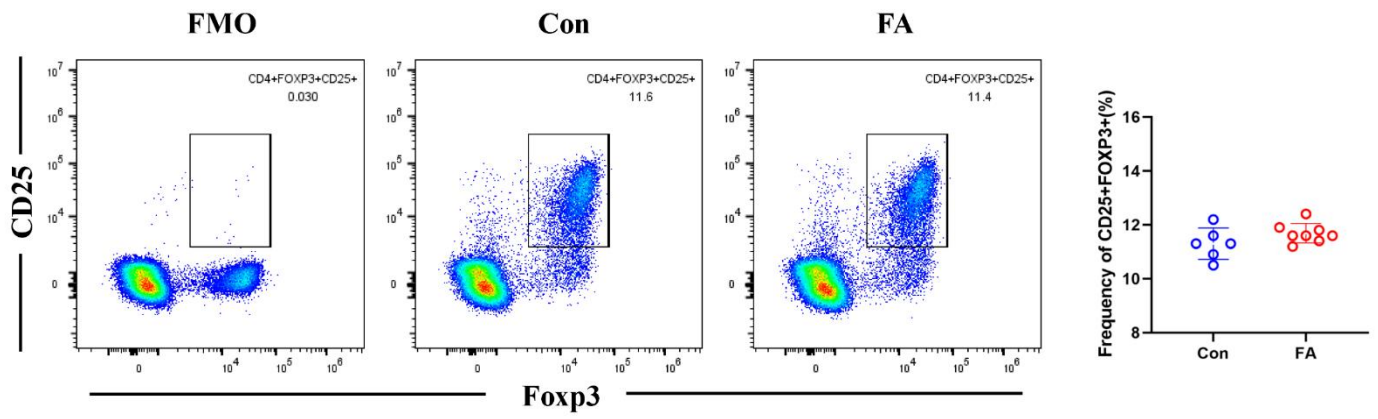

**Figure S4.** Flow cytometry analysis and frequency of CD4<sup>+</sup>FOXP3<sup>+</sup>CD25<sup>+</sup> T cells subset in mesenteric lymph node (MLN).

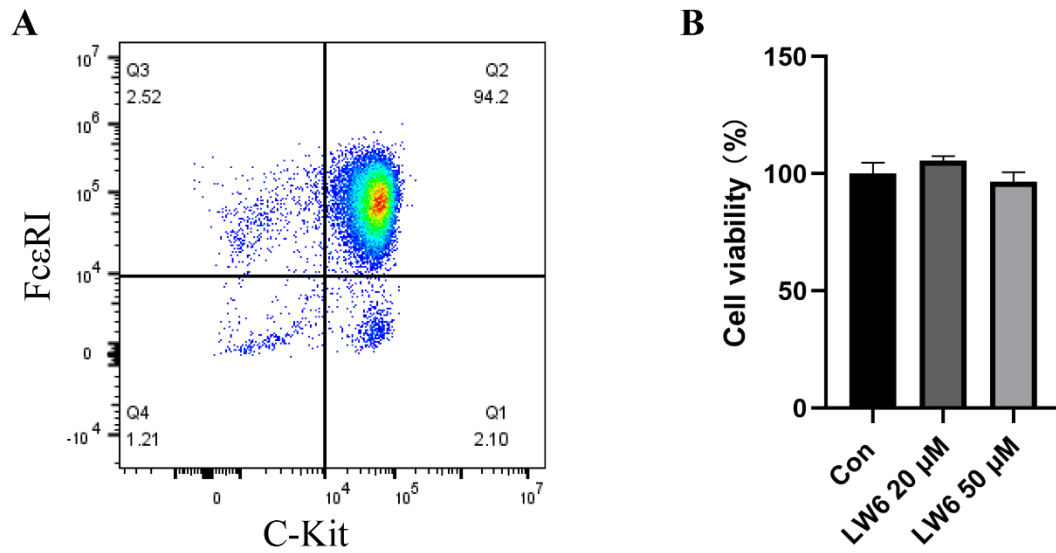

**Figure S5.** (A) Flow cytometric analysis of bone marrow-derived mast cells identified by  $Fc\epsilon RI^+CD117^+$  cells and (B) the effect of LW6 treatment on the cell viability of mast cells.
