# Supplementary figures and images for: Oral exposure to ovalbumin alters glucose metabolism in sensitized mice: upregulation of HIF-1α-mediated glycolysis
Source: Royal Society of Chemistry journal article supplement (doi:10.1039/d4fo04019h), 2024-12-17

### Figure 5A in our manuscript

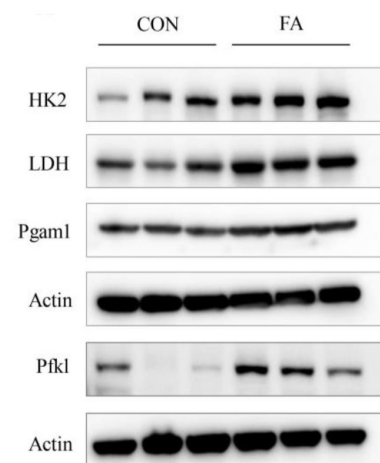

### Raw data in supplementary information

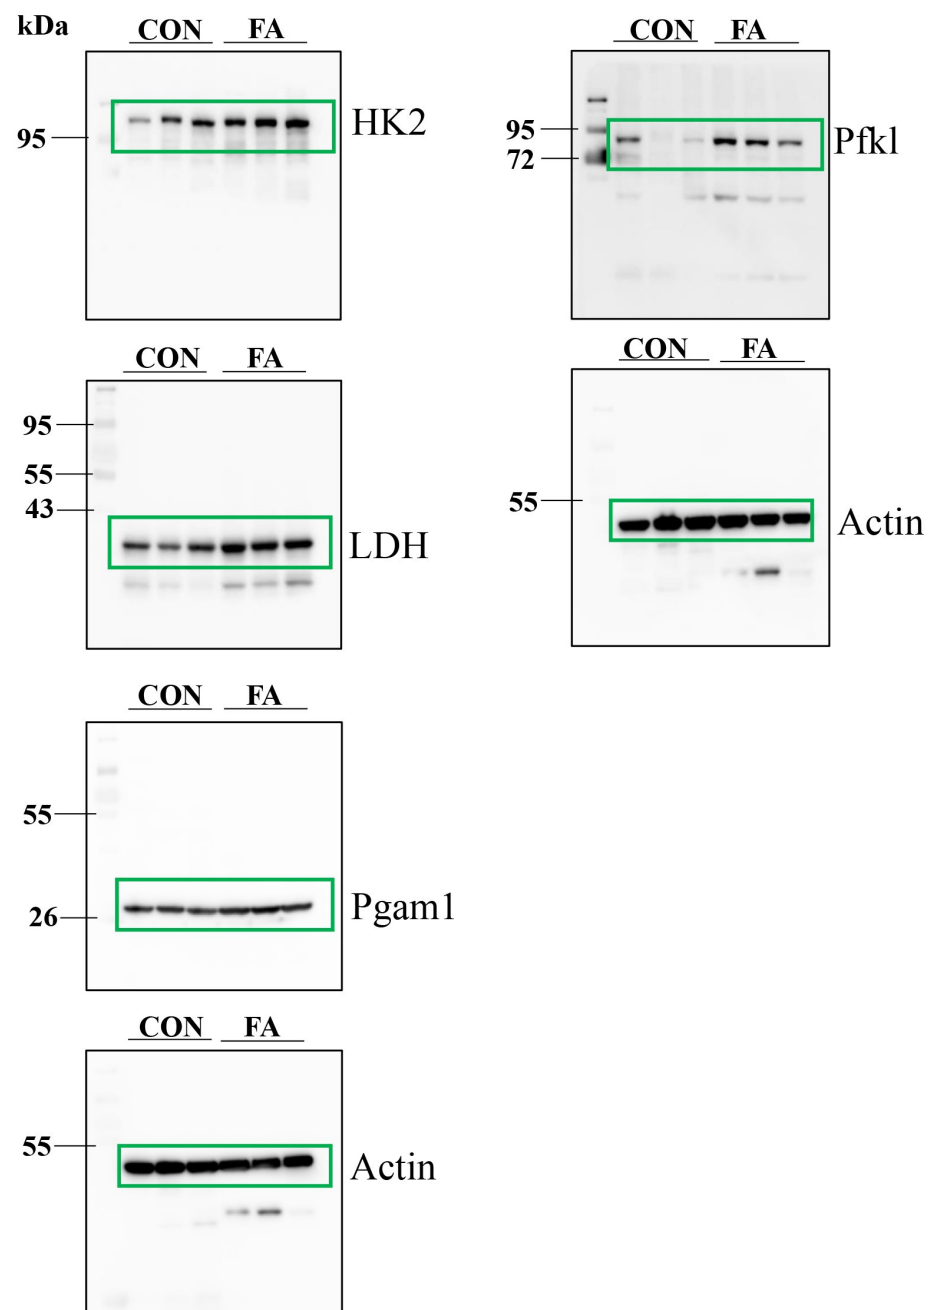

Supplement: d4fo04019h1.pdf [file d4fo04019h1.pdf]
